# Supplementary material for: Homer binds to Orai1 and TRPC channels in the neointima and regulates vascular smooth muscle cell migration and proliferation
Source: PubMed Central journal article supplement (PMC5506012; doi:10.1038/s41598-017-04747-w), 2017-07-11
Supplement: 41598_2017_4747_MOESM1_ESM.pdf [file 41598_2017_4747_MOESM1_ESM.pdf]

**Manuscript Title:** Homer binds to Orai1 and TRPC channels in the neointima and regulates vascular smooth muscle cell migration and proliferation

**Author List:** Shuping Jia, Miguel Rodriguez, Arthur G. Williams, Jr., and Joseph P. Yuan

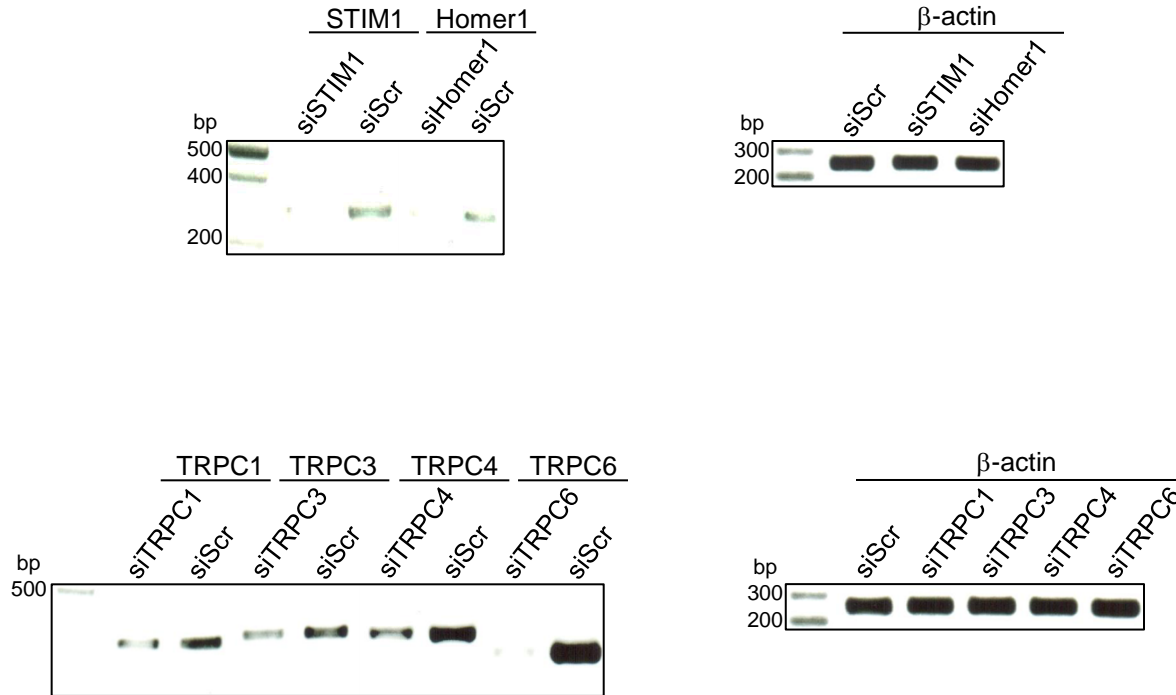

**Supplementary Figure 1: RT-PCR from total mRNA from cultured VSMCs treated with siScrambled, siSTIM1, siHomer1, or siTRPC1/3/4/6**

Complementary DNA (cDNA) expression levels of STIM1, Homer1, and TRPCs are reduced in cells treated with their respective siRNAs. Total mRNA was harvested from cultured VSMCs, and RT-PCR using gene-specific primers was performed according to standard protocols.

**Manuscript Title:** Homer binds to Orai1 and TRPC channels in the neointima and regulates vascular smooth muscle cell migration and proliferation

**Author List:** Shuping Jia, Miguel Rodriguez, Arthur G. Williams, Jr., and Joseph P. Yuan

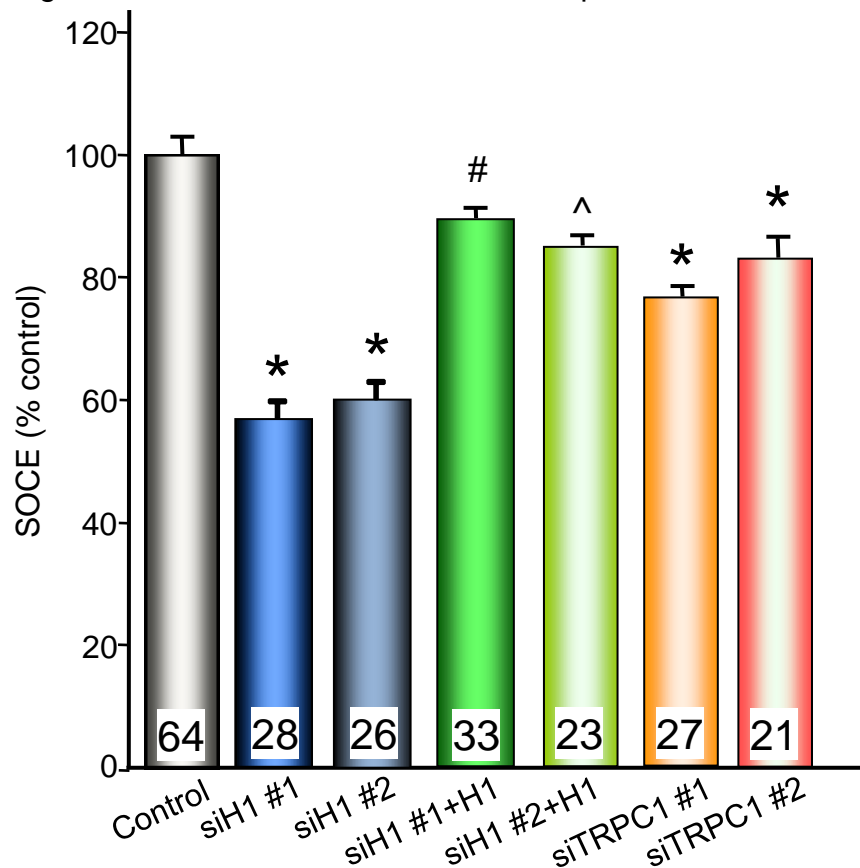

**Supplementary Figure 2: Two independent siRNA's for Homer1 and TRPC1 show similar effects on reducing store-operated Ca<sup>2+</sup> entry (SOCE) in cultured VSMCs**

Cultured aortic VSMCs were transfected with (a) Homer1(H1 #1) and Homer1(H1 #2) siRNAs targeting different regions of Homer1 and (b) TRPC1 #1 and TRPC1 #2 siRNAs targeting different regions of TRPC1. SOCE was measured after depleting ER Ca<sup>2+</sup> stores with 25 mM cyclopiazonic acid (CPA). SOCE values are normalized to peak Ca<sup>2+</sup> store depletion (CPA response) and indicated as % control (scrambled siRNA), which is set to 100%. SOCE values: siH1 #1: 56.0 ± 4.0%; siH1 #2: 60.0 ± 5.9%; siH1 #1 + H1(250ng): 90.6 ± 3.1%; siH1 #2 + H1(250ng): 88.6 ± 3.3%; siTRPC1 #1: 78.2 ± 2.3%; siTRPC1 #2: 85.6 ± 4.5%. siH1 #1 and siTRPC1 #1 are used in Figures 3 and 4. \*, p < 0.01 compared to control; #, p < 0.01 compared to siH1 #1; ^, p < 0.01 compared to siH1 #2.

**Manuscript Title:** Homer binds to Orai1 and TRPC channels in the neointima and regulates vascular smooth muscle cell migration and proliferation

**Author List:** Shuping Jia, Miguel Rodriguez, Arthur G. Williams, Jr., and Joseph P. Yuan

**Supplementary Table 1: Sequences for siRNA oligos and list of primers used for RT-PCR**

**siRNA oligonucleotides (oligos)**

---

siHomer1 #1: 5'-GGAAUUUAGUUAUGAAGAGUUUAAA-3'

siHomer1 #2: 5'-ACCAGAAAGUUUAAGUAGACACTT-3'

siSTIM1: 5'-GCCAUAGUCACAGUGAGAAGAAUAC-3'

siTRPC1 #1: 5'-GGAUAAAAGAAUGGAAGUUUGCUCGA-3'

siTRPC1 #2: 5'-GGAUACUCAACAACAUGGAUGTT-3'

siTRPC3: 5'-UGGACAGAAAUGC UAAUUAUGGUCT-3'

siTRPC4: 5'-GGACUCAAGCAUAGAUUAUGAUUTA-3'

siTRPC6: 5'-AGAGUCGAAACAAGAGGAAAGCCGC-3'

**RT-PCR primers used to examine mRNA expression in cultured aortic vascular smooth muscle cells (VSMCs)**

---

Homer1 forward primer: 5'-CAAGACAGAGCTGAGTCAGACAGTGCAGGAGC-3'

Homer1 reverse primer: 5'-TCTCTAGGAGTCTTCAGGTTACTGCGGAAAGC-3'

STIM1 forward primer: 5'-CCTGAGGCCCTGCAGAAGTGGCTGC-3'

STIM1 reverse primer: 5'-TATTGACAATCTGGAACCACAGAGGATCTCGA-3'

TRPC1 forward primer: 5'-AAAGGCAAGGTCAGACGGCAGAACAGCT-3'

TRPC1 reverse primer: 5'-TTGGGATAAAACATAGCATATTTAGAAGTCCGAAAGC-3'

TRPC3 forward primer: 5'-AGGTAAACCTCTTCACTCAGTCTAACTCGAGAGTTTTTG-3'

TRPC3 reverse primer: 5'-GGTTCAGTTTCTCACTGAGTTTATGAATCAAGATGGC-3'

TRPC4 forward primer: 5'-ATGAGAAGAGCCACAGCGAAGAAGAATTACTCG-3'

TRPC4 reverse primer: 5'-CAATCTCGTGGTCACATAATCTTCATGGGCA-3'

TRPC6 forward primer: 5'-AACAAACAATCAAGTACAAGGAGCTCAGAAGATTTCC-3'

TRPC6 reverse primer: 5'-TAAAGACAGTCTCTCCCAAGCTTTCTAATGAGTTCT-3'

$\beta$ -actin forward primer: 5'-ATGAAACTACATTCAATTCCATCATGAAGTGTGACG-3'

$\beta$ -actin reverse primer: 5'-CATCGTACTCCTGCTTGCTGATCCACATCTG-3'
